CORRECTION

## Correction: Uncoupling the roles of firing rates and spike bursts in shaping the STN-GPe beta band oscillations

Jyotika Bahuguna, Ajith Sahasranamam, Arvind Kumar

An additional affiliation is missing for the third author. Arvind Kumar is also affiliated with the Science for Life Laboratory, Solna, Sweden.

### Reference

1. Bahuguna J, Sahasranamam A, Kumar A. Uncoupling the roles of firing rates and spike bursts in shaping the STN-GPe beta band oscillations. PLoS Comput Biol. 2020;16(3):e1007748. <https://doi.org/10.1371/journal.pcbi.1007748> PMID: [32226014](https://pubmed.ncbi.nlm.nih.gov/32226014/)

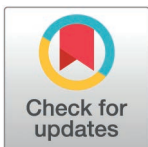

### OPEN ACCESS

**Citation:** Bahuguna J, Sahasranamam A, Kumar A (2025) Correction: Uncoupling the roles of firing rates and spike bursts in shaping the STN-GPe beta band oscillations. PLoS Comput Biol 21(11): e1013638. <https://doi.org/10.1371/journal.pcbi.1013638>

**Published:** November 3, 2025

**Copyright:** © 2025 Bahuguna et al. This is an open access article distributed under the terms of the [Creative Commons Attribution License](https://creativecommons.org/licenses/by/4.0/), which permits unrestricted use, distribution, and reproduction in any medium, provided the original author and source are credited.
